# A role for Sec8 in oligodendrocyte morphological differentiation

Mihaela Anitei<sup>1</sup>, Marius Ifrim<sup>2</sup>, Marie-Ann Ewart<sup>3</sup>, Ann E. Cowan<sup>1</sup>, John H. Carson<sup>1,2</sup>, Rashmi Bansal<sup>2</sup> and Steven E. Pfeiffer<sup>1,2,\*</sup>

<sup>1</sup>Program of Molecular Biology and Biochemistry, University of Connecticut Medical School, Farmington, CT 06030, USA

<sup>2</sup>Department of Neuroscience, University of Connecticut Medical School, Farmington, CT 06030, USA

<sup>3</sup>Division of Biochemistry and Molecular Biology, University of Glasgow, Glasgow, G12 8QQ, UK

\*Author for correspondence (e-mail: pfeiffer@neuron.uhc.edu)

Accepted 7 November 2005

Journal of Cell Science 119, 807-818 Published by The Company of Biologists 2006

doi:10.1242/jcs.02785

## Summary

In the central nervous system, oligodendrocytes synthesize vast amounts of myelin, a multilamellar membrane wrapped around axons that dramatically enhances nerve transmission. A complex apparatus appears to coordinate trafficking of proteins and lipids during myelin synthesis, but the molecular interactions involved are not well understood. We demonstrate that oligodendrocytes express several key molecules necessary for the targeting of transport vesicles to areas of rapid membrane growth, including the exocyst components Sec8 and Sec6 and the multidomain scaffolding proteins CASK and Mint1. Sec8 overexpression significantly promotes oligodendrocyte morphological differentiation and myelin-like membrane formation *in vitro*; conversely, siRNA-mediated

interference with Sec8 expression inhibits this process, and anti-Sec8 antibody induces a reduction in oligodendrocyte areas. In addition, Sec8 colocalizes, coimmunoprecipitates and cofractionates with the major myelin protein OSP/Claudin11 and with CASK in oligodendrocytes. These results suggest that Sec8 plays a central role in oligodendrocyte membrane formation by regulating the recruitment of vesicles that transport myelin proteins such as OSP/Claudin11 to sites of membrane growth.

Supplementary material available online at <http://jcs.biologists.org/cgi/content/full/119/05/807/DC1>

Key words: Exocyst, Oligodendrocyte, Myelin

## Introduction

Myelin is a highly polarized, metabolically active membrane that promotes saltatory conduction and participates in bi-directional signaling between neurons and oligodendrocytes (OLs) (Pfeiffer et al., 1993; Barres and Raff, 1999; Menon et al., 2003). Myelin membrane biogenesis, a defining process for OLs, requires coordinated sorting and recruitment of specialized proteins, lipids and mRNAs to distinct membrane subdomains (Trapp et al., 1995; Arroyo and Scherrer, 2000; Pedraza et al., 2001; Salzer, 2003; Trapp et al., 2004). This process has been investigated by analogy to polarized transport in epithelial cells (Minuk and Braun, 1996; deVries et al., 1998; deVries et al., 2000; Kroepfl and Gardinier, 2001) and neuronal synapses, leading to the identification of two classes of transport proteins, soluble *N*-ethylmaleimide-sensitive factor attachment protein receptors (SNAREs) and Rab-GTPases (Huber et al., 1994; Madison et al., 1996; Burcelin et al., 1997; Madison et al., 1999; Rodriguez-Gabin et al., 2001; Rodriguez-Gabin et al., 2004). Of these, the v-SNARE synaptobrevin-2 and Rab3a-GTPase are upregulated in mature OLs, suggesting that they play specific roles in myelination (Huber et al., 1994; Madison et al., 1999).

In addition to SNAREs and Rab-GTPases, other classes of molecules play essential roles in membrane formation and polarization, including the exocyst complex and multidomain scaffolding proteins (Roh and Margolis, 2003; Nelson, 2003). The exocyst is an octameric complex (Sec3, Sec5, Sec6, Sec8, Sec10, Sec15, Exo70 and Exo84) involved in the recruitment

of transport vesicles to areas of rapid membrane growth, a process followed by SNARE-mediated vesicle fusion (Novick et al., 1980; Ting et al., 1995; TerBush et al., 1996; Grindstaff et al., 1998; Hazuka et al., 1999). The exocyst is also important during earlier steps in the transport pathway, specifically in post-translational regulation of protein synthesis (Lipschutz et al., 2000; Lipschutz et al., 2003). These functions are essential, because an inactivating mutation in the Sec8 gene is embryonic lethal in mice, and Sec5, Sec6 and Sec10 are necessary for survival in *Drosophila melanogaster* (Friedrich et al., 1997; Andrews et al., 2002; Murthy et al., 2003; Murthy et al., 2005; Beronja et al., 2005; Mehta et al., 2005). In epithelial cells, through interactions with adhesion molecules, exocyst components are recruited to intercellular junctions where they control protein recruitment to basolateral membranes (Grindstaff et al., 1998; Yeaman et al., 2001; Yeaman et al., 2004). In neurons, members of the exocyst are involved in neurite outgrowth, and together with multidomain scaffolding proteins control receptor transport to the synapse (Hsu et al., 1998; Hazuka et al., 1999; Vega and Hsu, 2001; Sans et al., 2003). In mammalian cells, small GTPases such as RalA, TC10, Arf-6 or Rab11 regulate exocyst membrane recruitment and function (Brymora et al., 2001; Moskalenko et al., 2002; Sugihara et al., 2002; Inoue et al., 2003; Prigent et al., 2003; Zhang et al., 2004). Although the mechanism is still unclear, it has been proposed that exocyst proteins form subcomplexes (to which different components are sequentially added and/or removed during trafficking to the plasma membranes), and that

various members of the complex may be functionally heterogeneous (Moskalenko et al., 2003; Vik-Mo et al., 2003; Murthy et al., 2003; Murthy and Schwartz, 2004; Beronja et al., 2005).

Another level of exocyst functional regulation is provided by interactions between its components (e.g. Sec8) and multidomain scaffolding proteins, such as membrane-associated guanylate kinases (MAGUKs) (Sans et al., 2003; Yeaman et al., 2004). These are large molecules that contain multiple protein interaction domains and can form regulatory complexes involved in vectorial transport and membrane polarization (Hata et al., 1996; Gundelfinger and tom Dieck, 2000; Setou et al., 2000; Zhang et al., 2001; Lee et al., 2002; Leonoudakis et al., 2004). For example, CASK (calcium/calmodulin-dependent serine kinase), a member of the MAGUK family, associates with Mint1 and Velis in a complex involved in protein recruitment to neuronal synaptic junctions and to epithelial basolateral membranes (Butz et al., 1998; Setou et al., 2000; Martinez-Estrada et al., 2001; Lee et al., 2002; Olsen et al., 2002; Leonoudakis et al., 2004).

In the present study we show that Sec8, a representative exocyst component, plays key roles in regulating OL morphological differentiation and membrane formation, and we identify two new Sec8 binding partners, CASK and OL-specific protein (OSP/Claudin11), a major component of the myelin membrane.

## Results

### Sec8 and Sec6 are present in OLs

We studied the expression of Sec8 and Sec6, two representative components of the exocyst complex, in OLs and myelin. By immunoblot

analysis, Sec8 and Sec6 were detectable as unique bands at 110 kDa and 86 kDa, respectively, in OLs and astrocytes in culture, myelin and brain (Fig. 1A). Sec8 and Sec6 expression levels were not developmentally regulated during the OL lineage. Interestingly, Sec8 and Sec6 were present in purified myelin membranes, paralleling earlier observations of SNARE and Rab proteins in myelin (Madison et al., 1996; Madison et al., 1999).

We next analyzed the subcellular distribution of Sec8 in OLs in enriched cultures. Using double-label confocal immunofluorescence microscopy, we found that Sec8 was present in the soma, where it overlapped partially with the

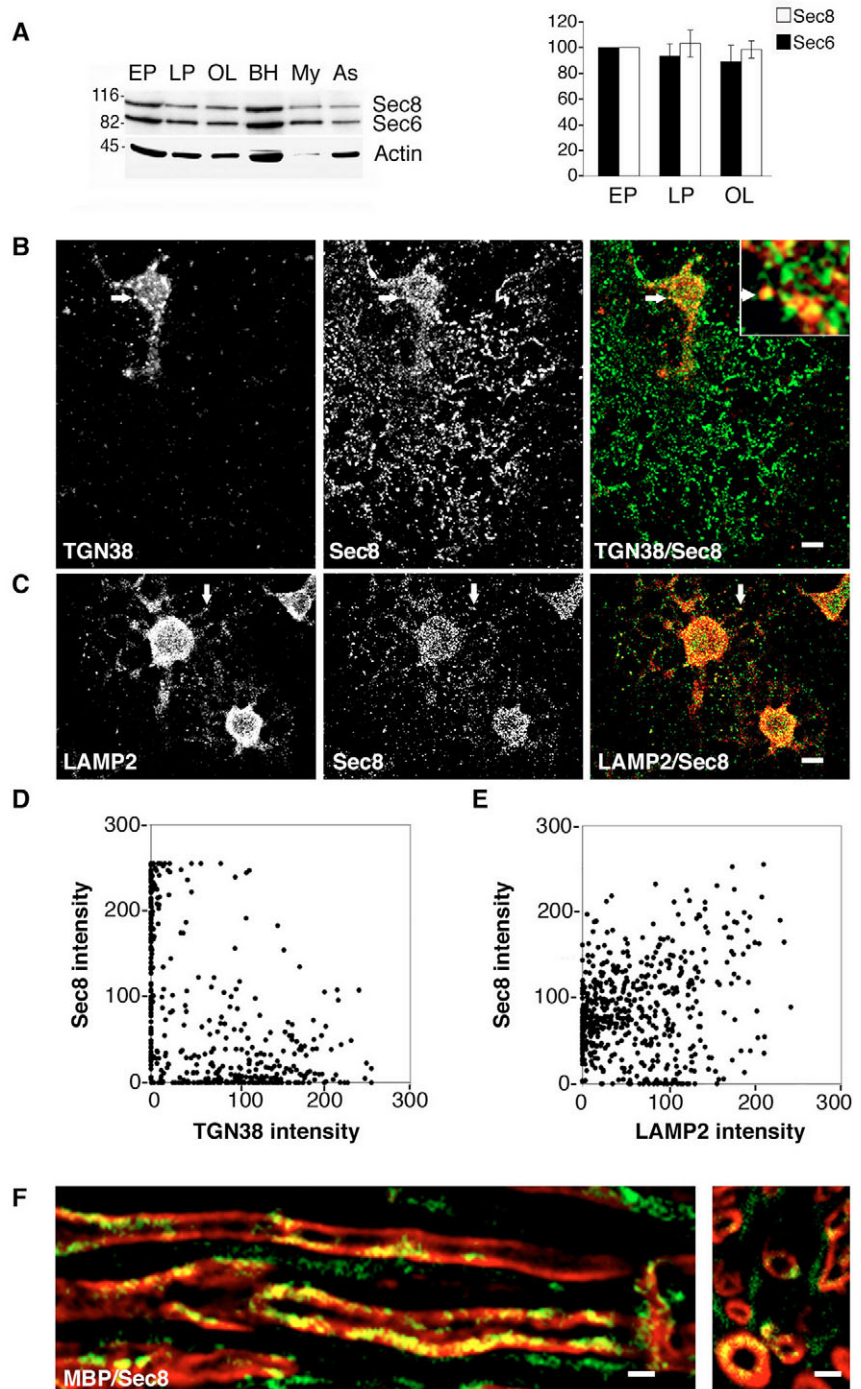

**Fig. 1.** The exocyst components Sec8 and Sec6 are present in OLs and myelin. (A) OL lineage cells, myelin, brain homogenate and astrocytes were analyzed by immunoblot (10  $\mu$ g protein/lane). The levels of Sec8 and Sec6 were normalized to actin and quantified for  $n=3$  independent OL cultures. (B-E) Sec8 (green) colocalization with (B) TGN38 (red) and (C) LAMP2 (red) in OL processes was assessed by confocal microscopy and ratiometric particle analysis for (D) 434 and (E) 560 randomly chosen puncta in eight representative OLs, two independent cultures per condition. (B) The arrows indicate colocalization between TGN38 and Sec8, shown at a higher magnification in the inset. (F) Sec8 (green) is detectable along MBP-positive (red) myelinated axons in mouse spinal cords sectioned longitudinally (left panel) or transversally (right panel). No immunofluorescence was detected when cells and/or sections were incubated with pre-immune IgGs and secondary Abs (data not shown). EP, early OL progenitors; LP, late OL progenitors; OL, mature OLs; BH, whole-brain homogenate; My, myelin; As, astrocytes. Bars, 10  $\mu$ m (B,C), 2  $\mu$ m (F).

trans-Golgi network (TGN) marker TGN38 (Fig. 1B inset, arrows) and with the endosomal marker LAMP2 (Fig. 1C). Sec8 was also present in the myelin-like membranes in terminally differentiated OLs (Fig. 1B) and in the processes of less mature OLs lacking membrane sheets (Fig. 1C, arrows). Sec8 was present in punctate structures, consistent with its proposed association with the vesicular transport pathway. Colocalization of Sec8 puncta with TGN38 or LAMP2 along OL processes was quantified by single-particle ratiometric analysis (Barbarese et al., 1995). For this, uniform background staining was subtracted in both channels and the intensities in the red (R) and green (G) channels associated with each well-resolved punctum were measured. Particles labeled exclusively in red are situated on the *x*-axis, whereas those labeled exclusively in green are on the *y*-axis; particles equally labeled in red and green are on the bisector line. We found that clearly resolved Sec8 puncta overlapped with ~28% of the rare TGN38-positive puncta (Fig. 1D) and with ~50% of the LAMP2-positive puncta (Fig. 1E). To assess the distribution of Sec8 *in vivo* we analyzed spinal cord sections by confocal immunofluorescence microscopy. Sec8 was present in clusters along longitudinal sections of MBP-positive myelinated axons (Fig. 1F, left panel) and labeled a fraction of the myelinated axons in cross-section (Fig. 1F, right panel).

In conclusion, in OLs Sec8 is associated both with a cytoplasmic compartment and with the myelin membrane, suggesting that, following vesicle fusion, Sec8 remains partly associated with its target membranes and is partly recruited to the recycling endosomal pathway.

### Sec8 plays a role in OL differentiation and membrane formation

To determine the potential contribution of Sec8 to OL membrane formation, we overexpressed the protein in primary cultures of OLs. Progenitor cells were infected overnight with adenoviruses (AV) expressing either enhanced green fluorescent protein (EGFP) (EGFP-AV) (Fig. 2A) or a FLAG-tagged form of Sec8 (Sec8-AV) (Fig. 2B-D), with a ~70% infection efficiency. Cells were allowed to differentiate for 72 hours in defined medium, then fixed and double-labeled with antibodies (Abs) against FLAG to identify infected cells, and myelin basic protein (MBP) to identify mature OLs. Exogenous Sec8 was localized in the OL soma (Fig. 2B, arrows; 2C,D), processes (Fig. 2B,C) and myelin-like membranes (Fig. 2D), similar to the endogenous protein (see Fig. 1, above). By contrast, control EGFP was detected mainly in the cytoplasm by using the same image acquisition parameters (Fig. 2A). The number of MBP-positive mature OLs was modestly increased to 29±3% by Sec8-AV expression, compared with 19±5% for control EGFP-AV ( $P<0.04$ ) (Fig. 2E). We further analyzed OL differentiation by dividing infected OLs into three categories according to their morphological complexities (see Materials and Methods): low (Fig. 2B), medium (Fig. 2C) and high (Fig. 2D). Sec8-AV expression significantly increased the number of mature OLs with highly complex morphology when compared with control EGFP-AV ( $P_{\text{high}}<0.001$ ;  $P_{\text{medium}}<0.017$ ;  $P_{\text{low}}<0.15$ ) (Fig. 2F). Accordingly, the areas of OLs expressing Sec8-AV were larger than those of OLs in the control group (Fig. 2G).

To evaluate the effect of Sec8 on OL protein expression,

infected cells were harvested and the lysates analyzed by immunoblot (Fig. 3). Protein levels in Sec8-AV-infected cells were compared with both control EGFP-AV- (Fig. 3A) or null-control-AV- (Fig. 3C) infected cells. In both cases, increased Sec8 levels were correlated with higher levels of MBP (~1.5-fold;  $P<0.002$ ). We further analyzed and quantified a larger set of myelin proteins and found that an approximately twofold Sec8 overexpression resulted in significant increases in the levels of membrane proteins such as OSP/Claudin11 and myelin associated glycoprotein (MAG) (~twofold;  $P<0.002$ ). By contrast, no significant changes were observed for 2,3-cyclic nucleotide 3-phosphodiesterase (CNP), an OL protein associated with the cytoskeleton (Dyer and Benjamins, 1989; Bifulco et al., 2002; Lee et al., 2005), CASK ( $P>0.05$ ) or actin ( $P>0.7$ ) (Fig. 3A,B). Sec6 levels were increased in some cases, but without reaching statistical significance ( $P>0.7$ ). In conclusion, Sec8 overexpression led to an increase in the levels of a subset of myelin proteins, consistent with a higher membrane complexity as observed by immunofluorescence microscopy, and suggesting a general increase in membrane addition.

To test whether Sec8 is necessary for OL differentiation we analyzed the effect of small interference RNA (siRNA)-mediated Sec8 gene silencing in these cells. Progenitor cells were transfected with 50 nM siRNAs, allowed to differentiate for 48 hours and were analyzed by immunocytochemistry and immunoblot (Fig. 4). Transfection efficiency was assessed by fluorescence microscopy analysis of fluorescently tagged siGloCyclophilinB siRNAs (siGloCipB) (Fig. 4A). Transfected siRNAs were detectable as perinuclear (arrows) and nuclear fluorescent puncta in 60–70% of cells, whereas non-transfected siRNAs were occasionally detectable on plasma membranes. By immunoblot analysis, we found that Sec8 siRNAs reduced Sec8 protein levels by 60–75% compared with control siRNAs (Fig. 4B). Interestingly, the amount of MBP, protein expressed by mature OLs, was also significantly reduced, whereas no changes were seen in the levels of Sec6. By fluorescence immunocytochemistry we found that Sec8 siRNAs reduced the number of mature OLs 2.5-fold to threefold ( $P<0.00002$ ) (Fig. 4C,D) and decreased the number of OLs with medium ( $P<0.03$ ) and high ( $P<0.01$ ) morphological complexity, whereas reciprocally increasing the number of those with low complexity ( $P<0.0005$ ) (Fig. 4E). This was consistent with an observed delay in process formation and reduction in cell survival in OLs transfected with Sec8 siRNAs. We evaluated cell death by propidium iodide incorporation and found that survival was 58±5% for the cells transfected with Sec8 siRNAs compared with 80±5% for cells transfected with control siRNAs or non-transfected cells ( $n=2000$  cells/condition,  $n=6$  from three independent cultures,  $P<0.006$ ). This suggests that Sec8 is a central player in OL vesicular transport and thus important for OL survival and morphological differentiation.

To test the role of Sec8 block-of-function in mature OLs, we co-injected either anti-Sec8 Ab or control IgG and dextran (used to identify injected OLs) into cells. One hour after microinjection, OLs were fixed, labeled with anti-MBP Ab and analyzed. In both conditions we found similar backgrounds of cells with fragmented processes and/or membranes (shown as group1) suggesting that anti-Sec8 Ab is not toxic for OLs. Interestingly, OLs injected with anti-Sec8 Ab had significantly

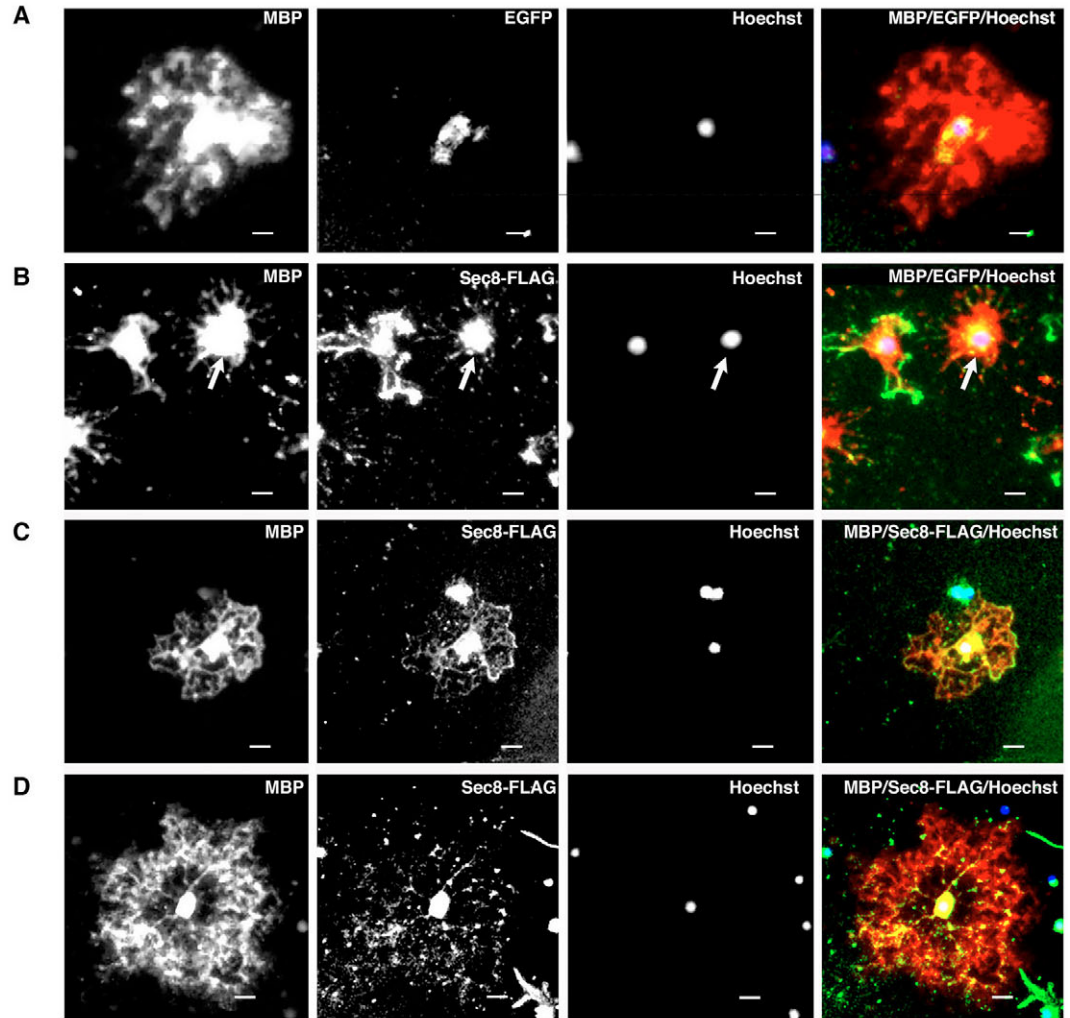

**Fig. 2.** Sec8 overexpression favors OL morphological differentiation. (A-D) OL progenitors were infected overnight with adenoviruses encoding (A) control EGFP (EGFP-AV) or (B-D) FLAG-tagged Sec8 (Sec8-AV), allowed to differentiate for 3 days, fixed, labeled with anti-MBP- (red) and anti-FLAG- (green) Abs and analyzed by epifluorescence microscopy. OLs were assigned to three morphological categories: (B) low, (C) medium or (D) high complexity. Cell bodies were overexposed in order to observe protein localization in the processes. Bars, 10  $\mu$ m; px, pixels. (E) Mature MBP-positive cells were plotted as percentage of the total infected cells. (F) The number of OLs in each morphological category is shown as a percentage of the total MBP-positive OLs (500 cells/condition,  $n=6$  from three independent cultures). (G) The areas of 100 randomly chosen MBP-positive cells per condition were measured and plotted. Only infected cells were analyzed. (E-G) White bars, control EGFP-AV; black bars, Sec8-AV infected.

smaller areas and shorter processes (shown as group 2 and corresponding to the low and medium morphological complexities described in Fig. 2) when compared with control mouse IgG-injected cells that had higher morphological complexities (shown as group 3). This suggests a role for Sec8 in cytoskeleton dynamics and membrane maintenance, in congruence with data suggesting a role for exocyst components in cytoskeleton modulation in other systems (Vega and Hsu, 2001; Sugihara et al., 2001; Wang et al., 2004; Aronov and Gerst, 2004). In summary, the three experimental approaches

described above are consistent in indicating that Sec8 plays a central role in OL membrane formation and maintenance.

#### Sec8 associates with CASK and OSP/Claudin11

To identify some of the Sec8 binding partners in OLs, we used immunoprecipitation, subcellular fractionation and immunocytochemistry of enriched populations of OLs in culture (Fig. 6). We asked whether Sec8 associated in OLs with CASK, a multidomain scaffolding protein that is also involved in protein transport to the neuronal synapse and to the epithelial

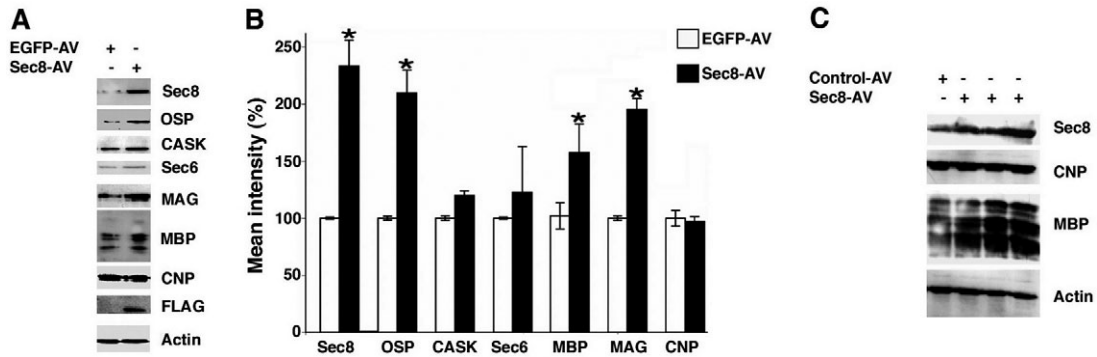

**Fig. 3.** Sec8 overexpression increases the levels of a subset of myelin proteins. OL progenitors were infected with Sec8-AV and either (A) control EGFP-AV or (C) control null-AV and allowed to differentiate for 3 days in defined medium. Cell lysates were analyzed by immunoblot for (A) Sec8, Sec6, OSP/Claudin11, CASK (10  $\mu$ g protein/lane); MAG, CNP, MBP, actin (2  $\mu$ g protein/lane) and (B), and data are presented as percentage of control levels. (C) Cell lysates were analyzed for Sec8, MBP, CNP and actin (10  $\mu$ g protein/lane).  $n=5$  from three independent cultures, \* indicates statistically significant differences.

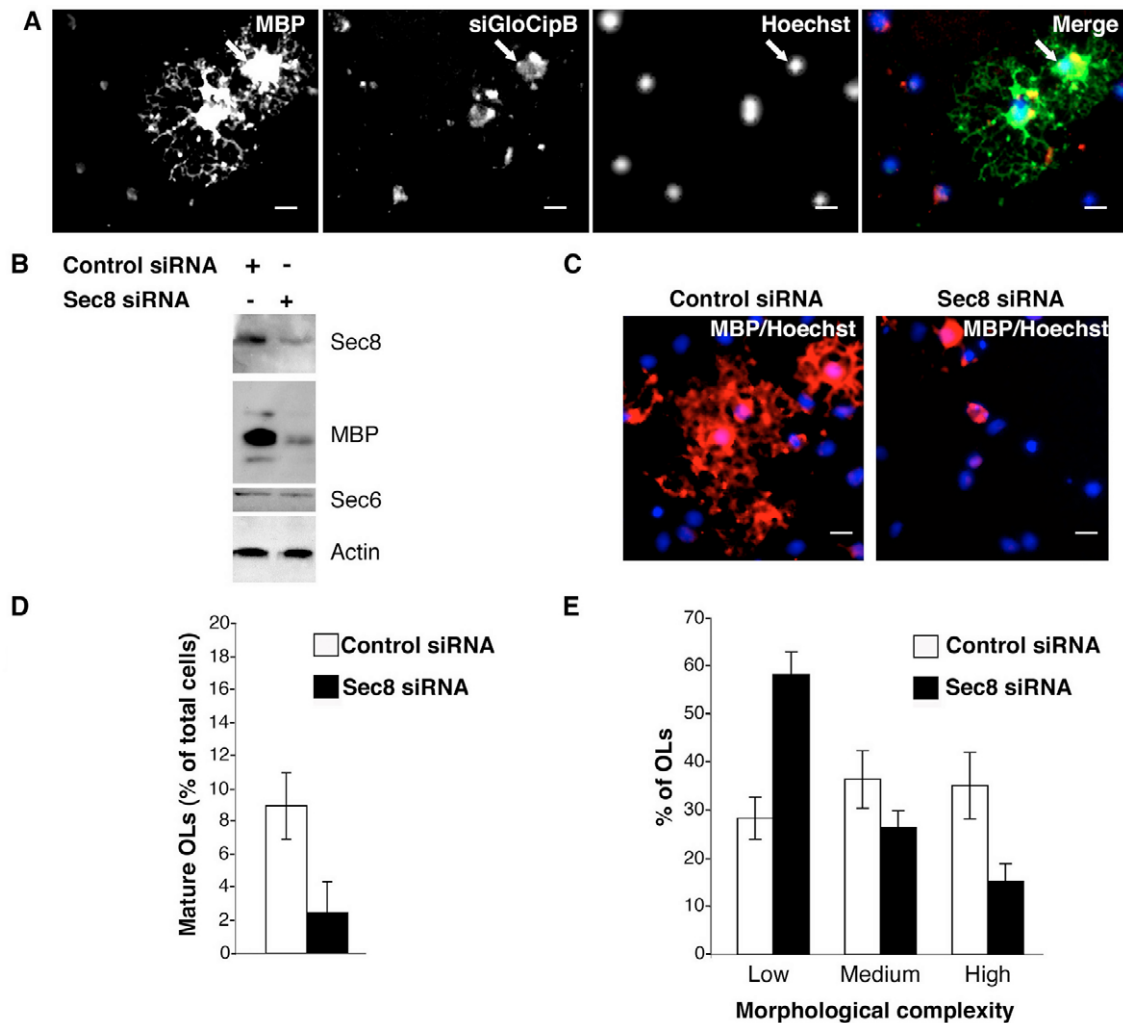

**Fig. 4.** siRNA-mediated interference with Sec8 expression decreases OL morphological differentiation. OL progenitors were transfected with (A) fluorescently tagged siRNAs (siGloCipB, red) and (B-E) Sec8 or control siRNAs. Arrows in A indicate a siGlo-positive perinuclear punctum. Cells were allowed to differentiate for 2 days and analyzed by (A,C) fluorescence microscopy for MBP and Hoechst or (B) immunoblot for Sec8, Sec6, MBP and actin ( $n=8$  from four independent cultures). (D) The number of mature MBP-positive cells was plotted as a percentage of the total Hoechst-labeled nuclei (5000 cells/condition,  $n=11$ , four independent cultures). (E) Morphological complexity of CNP-positive OLs was analyzed for 900 cells/condition ( $n=6$ , two independent cultures). Bars, 10  $\mu$ m.

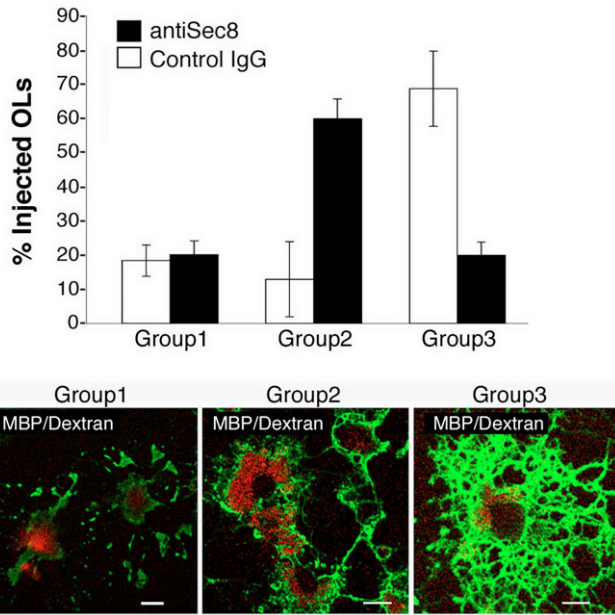

**Fig. 5.** Ab perturbation of Sec8 function significantly influences OL morphology. Mature OLs in culture were microinjected with dextran (red) and either anti-Sec8 Ab or IgG; 60 minutes after injection, cells were fixed and labeled with anti-MBP Ab (green). Cells were analyzed into three groups: (a) group 1: cells with fragmented processes and/or membranes; (b) group 2: cells with small areas and short processes (low and medium morphological complexity) and (c) group 3: cells with high complexity. Cells in each group are shown as percentage of the total dextran-positive injected cells (173 cells injected with anti-Sec8 Ab; 112 cells injected with IgG;  $n=3$  independent experiments;  $P<0.003$ ). Bars, 10  $\mu\text{m}$ .

basolateral membrane (see Introduction). We found that, indeed, anti-Sec8 Ab coimmunoprecipitated CASK and Sec8 – a known Sec8 binding partner – at similar levels, and that anti-CASK Ab coimmunoprecipitated Sec8 (Fig. 6A).

Interestingly, Sec8 and, to a lower degree, CASK, were coimmunoprecipitated (both from OL and brain lysates) with a major myelin protein, OSP/Claudin11, but not with myelin OL protein (MOG) (Fig. 6A). Since a significant amount of OSP/Claudin11, but not MOG, associates in OLs with glycosphingolipid/cholesterol-enriched membrane domains (also known as lipid rafts) (Kim and Pfeiffer, 1999; Marta et al., 2003; Marta et al., 2005), we asked whether Sec8 and CASK are present in this membrane fraction (Fig. 6B). For this, OL post-nuclear supernatants were extracted with 1% Triton X-100 (30 minutes, 4°C) and the insoluble fraction was floated on a 5–35% sucrose gradient prior to immunoblot analysis. We found that a significant proportion of total Sec8 and CASK were insoluble in these conditions and that they cofractionated with OSP/Claudin11 at low density on sucrose gradients. These proteins were also detectable in the heavier fractions, probably the reflection of interactions with cytoskeletal elements (Kim and Pfeiffer, 1999).

To analyze the relative localizations of OSP/Claudin11, CASK and Sec8, we used confocal double-immunofluorescence microscopy and ratiometric analysis of fluorescently labeled puncta (Fig. 6C–E, arrows). In OL

processes and myelin-like membranes, OSP/Claudin11 colocalized with CASK in ~65% of the analyzed puncta (Fig. 6C) and with Sec8 in ~60% of the puncta (Fig. 6D). By contrast, Sec8 colocalized with MOG in only ~30% of the puncta (Fig. 6E). Owing to technical difficulties (both Abs were produced in mouse), we did not directly study the relative localization of Sec8 and CASK. In conclusion, Sec8 and CASK might specifically regulate OSP/Claudin11 recruitment to the myelin membrane.

#### CASK is associated with motile vesicle-like structures in OLs

To determine whether CASK, identified as a Sec8 binding partner, was indeed associated with transport vesicles, we transfected OL progenitors with CASK-EGFP and analyzed live OLs by time-lapse microscopy (Fig. 7A,B). We chose to analyze CASK-EGFP because its intracellular localization is similar to that of the endogenous protein, whereas Sec8-EGFP fails to associate with its target membranes (Matern et al., 2001; Maximov and Bezprozvanny, 2002). CASK-EGFP adopted a punctate pattern in OL processes, similar to the endogenous protein, even though it was overexpressed (Fig. 7A). One representative time-lapse series for CASK-EGFP dynamics is shown in Fig. 7B and in supplementary material Movie 1. We observed two classes of puncta: (1) large (0.8–2  $\mu\text{m}$ ), relatively stationary (velocities  $<0.05$   $\mu\text{m}/\text{second}$ ), associated mainly with branching points, and (2) small (0.2–0.4  $\mu\text{m}$ ) mobile structures (arrows) that moved with velocities of 0.2–0.25  $\mu\text{m}/\text{second}$ . Similar dynamics have been previously described for motor-driven transport vesicles and RNA granules in various cell types, including OLs (Ainger et al., 1993; Hirokawa and Takemura, 2005; Zaliapin et al., 2005). It remains to be investigated how many of these puncta colocalize with Sec8 and OSP/Claudin11. To further understand the nature of CASK puncta in OL processes, we used fluorescence confocal microscopy and particle ratiometric analysis to study its localization relative to dynein, a molecular motor associated with transport vesicles. CASK was detectable in approximately 80% of the dynein-positive puncta (Fig. 7C, arrows). In neurons, CASK associates with transport vesicles as part of a larger protein complex that includes Mint1 (Setou et al., 2000). The interaction between Mint1 and CASK appears to be conserved in OLs, because Mint1 was coimmunoprecipitated by anti-CASK Ab in these cells (supplementary material Fig. S1). Together, these data suggest that CASK is associated with motor-driven transport vesicles in OL processes.

CASK expression and localization were also analyzed by confocal immunofluorescence microscopy in myelinating OL-neuronal cocultures, brain and spinal cord (Fig. 8). In cocultures, CASK was present in MBP-positive OLs (Fig. 8A, arrows) and also along the MBP-positive internodes of myelinated fibers (Fig. 8A, arrowheads). In vivo, anti-CASK Ab also labeled MBP-positive cells (Fig. 8B) and MBP-positive myelinated axons (Fig. 8C). The arrows indicate CASK localization near the plasma membranes that separate two adjacent cells (Fig. 8) and CASK presence in a myelinated fiber in cross-section (Fig. 8C). In conclusion, we show that key multidomain-proteins (e.g. CASK, Mint1) are present in OLs where they might play a role in protein trafficking to the myelin membranes.

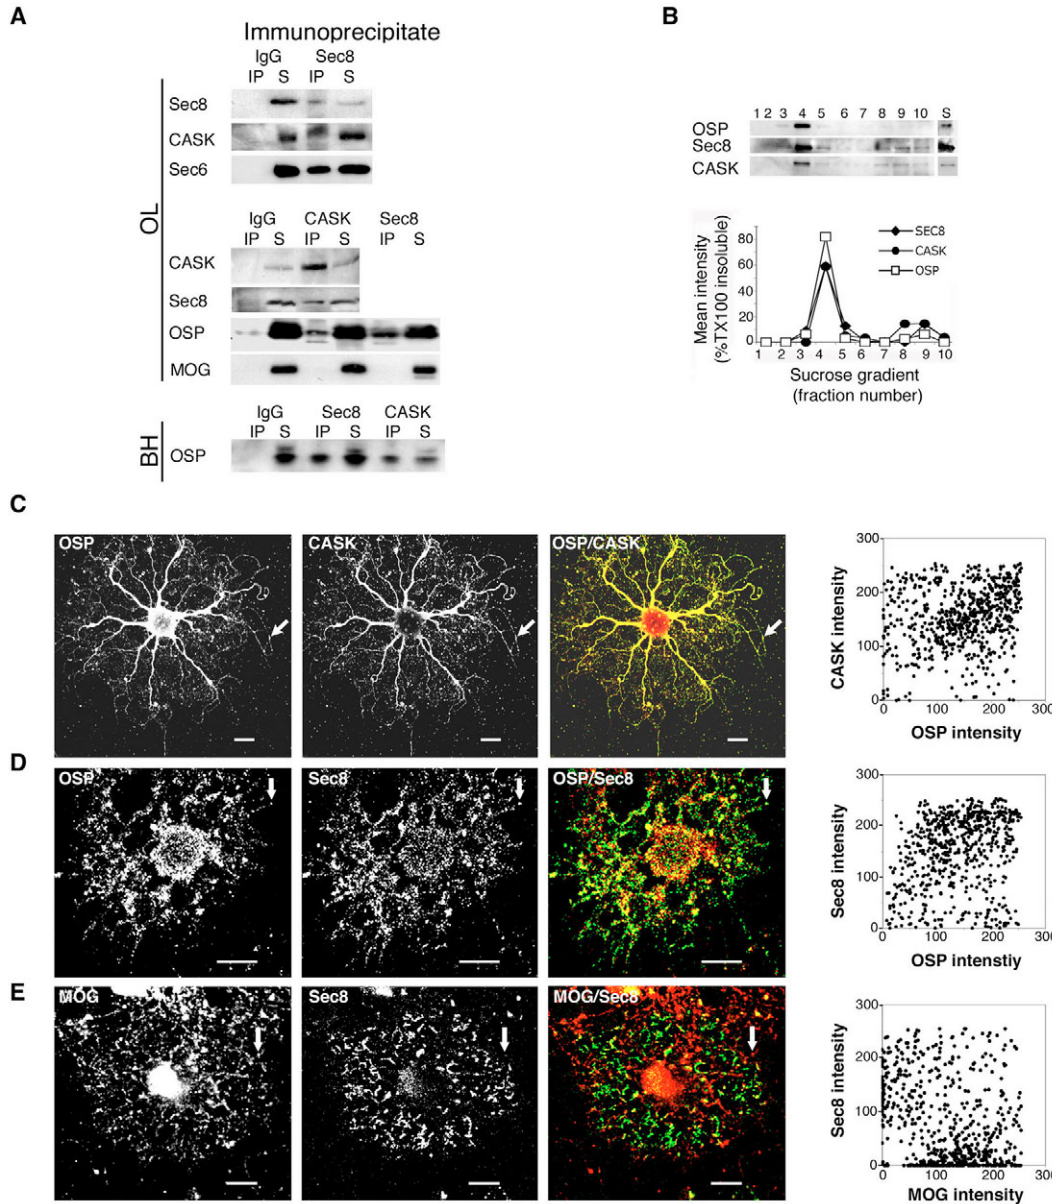

**Fig. 6.** Sec8 associates with CASK and OSP/Claudin11 in OLs. (A) Sec8, CASK and OSP/Claudin11 coimmunoprecipitate. Mature OL lysates were incubated with anti-Sec8 Ab (2E12), anti-CASK Ab or pre-immune IgG and immunoprecipitates were analyzed by immunoblot. IP, immunoprecipitate; S, 10% of the supernatant fraction. (B) OSP/Claudin11, Sec8 and CASK cofractionate and float to low densities on sucrose gradients. The 1% Triton X-100 insoluble pellet fractions were isolated from mature OL lysates at 4°C, floated on sucrose-step gradients and analyzed by immunoblot; S, 15% of the soluble fraction. (C-E) Colocalization of (C) CASK (green) and OSP/Claudin11 (red), (D) Sec8 (green) and OSP/Claudin11 (red) or (E) Sec8 (green) and MOG (red) in OL processes was analyzed by confocal microscopy and ratiometric particle analysis for ~680 randomly chosen puncta in 5-7 representative cells, three independent cultures. The Abs used for colocalization analysis were against the intracellular C-terminal regions of OSP/Claudin11 and MOG. Bars, 10 μm. Arrows indicate fluorescent puncta positive for OSP and CASK (C), positive for OSP and Sec8 (D), or positive for MOG, but not for Sec8 (E).

**Discussion**

Eukaryotic cell growth and differentiation depend on the precise regulation of vesicle transport, a highly conserved mechanism for inserting additional membrane to the plasmalemma (Nelson, 2003; Jahn, 2004). Thus, protein complexes that control vectorial trafficking and capture of transport vesicles to their target membranes are expected to be essential for OL differentiation, a process characterized by rapid process extension, membrane expansion and polarization (Colman et al., 1982; Pfeiffer et al., 1993; Madison et al., 1999). It has been suggested that myelin proteins and lipids are added at the ‘trailing edge’ of the myelin spiral (Gould et al., 1977), but the molecular players and the interactions involved in these processes are not well understood.

In the present study, we provide evidence that Sec8 plays a central role in OL membrane formation. Thus, Sec8 overexpression favored the formation of mature OLs with high morphological complexity and large myelin-like membranes,

concomitantly increasing the expression of a subset of myelin membrane proteins. Reciprocally, siRNA-mediated interference with Sec8 expression resulted in delayed OL differentiation and decreased OL morphological complexity, and intracellular Ab-mediated blocking of Sec8 induced a reduction in OL cell area. It is likely that interference with Sec8 function perturbs vesicle capture to the membrane and influences cytoskeletal dynamics (Grindstaff et al., 1998; Vega and Hsu, 2001; Sugihara et al., 2002; Wang et al., 2004; Tsuboi et al., 2005), leading to a delay in membrane addition and consequently in OL differentiation. Together these data provide a pattern consistent with the hypothesis that in OLs Sec8 is instrumental for exocytosis and thus for process growth and myelin-membrane-formation and -maintenance.

Components of the exocyst, including Sec8, play a role not only in the recruitment of transport vesicles to the plasma membranes, but also in early secretory events (e.g. protein translation, translocation) in yeast, epithelial cells and neurons

(Toikkanen et al., 2003; Lipschutz et al., 2003; Sans et al., 2003). In epithelial cells, for example, exocyst components stimulate the synthesis of basolateral but not apical proteins, and subsequently favor membrane addition to the epithelial basolateral compartment during tubulogenesis (Lipschutz et al., 2000; Lipschutz et al., 2003). In OLs, Sec8 might be involved in a similar pathway, that coordinates early events in protein synthesis with the exocytic machinery for a specific subset of proteins, including MBP and MAG, but not CNP; differential regulation of these proteins has been suggested to play a role in myelin membrane formation and maturation (Pfeiffer et al., 1981; Campagnoni et al., 1991). Sec8 localization to the endoplasmic reticulum in OLs (data not shown) suggests a role for this protein during early steps in the secretory pathway, but further experiments are required to understand its potential function (e.g. pre- versus post-translational events).

Sec6, another component of the exocyst complex, is also present in OLs and myelin. Consistent with previous studies in other systems (Terbush et al., 1996; Vega and Hsu, 2001; Moskalenko et al., 2003), Sec6 coimmunoprecipitates with Sec8 in OLs, suggesting they associate during transport. However, compared with Sec8, Sec6 displays a stronger association with a higher density, tubulin-enriched subcellular fraction (data not shown). In addition, anti-CASK Ab coimmunoprecipitates Sec8 well, but Sec6 only weakly (data not shown), consistent with distinct Sec8 and Sec6 profiles identified in various systems by coimmunoprecipitation (Sans et al., 2003; Beronja et al., 2005), co-sedimentation (Beronja et al., 2005) and sub-cellular distribution (Vik-Mo et al., 2003; Beronja et al., 2005). Together, these data suggest that subpopulations of Sec8 and Sec6 become part of the same complex during transport, although they might also have distinct functions. It should prove interesting for future studies to characterize Sec6 function in OLs.

We have also identified additional components of the OL transport machinery, including the multidomain scaffolding proteins CASK and Mint1. Sec8 and the CASK/Mint1 complex are involved in NMDA receptor transport to the neuronal synapse (Setou et al., 2000; Fallon et al., 2002; Sans et al., 2003). We describe for the first time an association between CASK and Sec8 in OLs. This association is likely to occur as part of a larger complex, which might link the vesicle-associated complex with either molecular motors that drive vesicle transport along microtubules or with the vesicle-docking and fusion-machinery, as previously shown in neurons (Setou et al., 2000; Biederer and Sudhof, 2000).

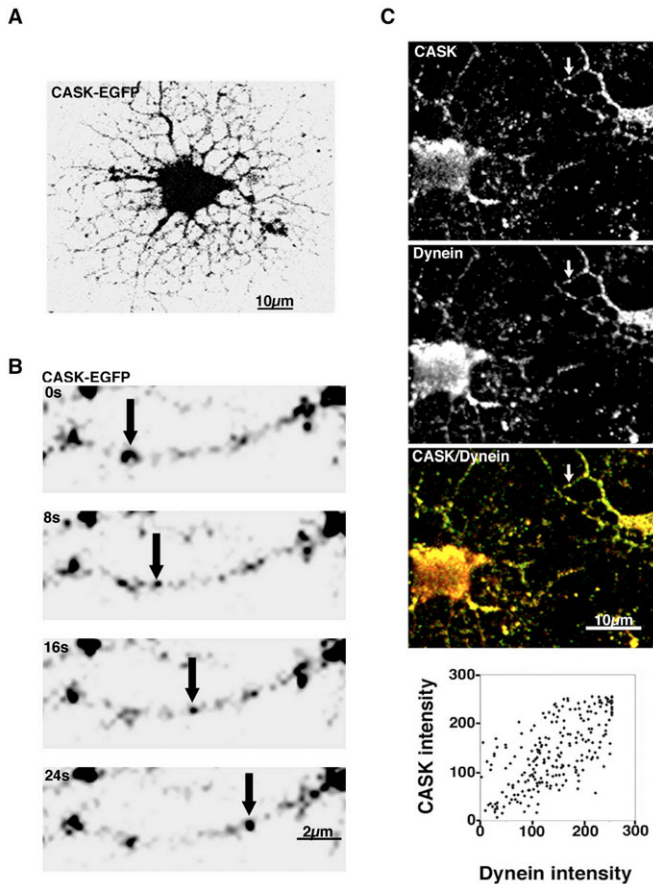

**Fig. 7.** CASK is present in mobile vesicle-like structures in OLs. (A,B) OL progenitors in culture were transfected with a CASK-EGFP fusion protein and OLs were analyzed by confocal microscopy after 3 days. Images were converted to grayscale mode and colors inverted; CASK-EGFP is shown in black. (B) Time-lapse analysis of CASK-EGFP in a representative OL process segment shows that the protein is present in mobile puncta (arrows). Images were collected every 8 seconds. (C) OLs in culture labeled with anti-CASK Ab (green) and anti-dynein Ab (red) were analyzed by confocal microscopy and colocalization in OL processes was quantified for 280 puncta in eight representative cells from two independent cultures. Arrows indicate a fluorescent punctum positive for CASK and dynein. Bars, 10  $\mu\text{m}$  (A,C), 2  $\mu\text{m}$  (B).

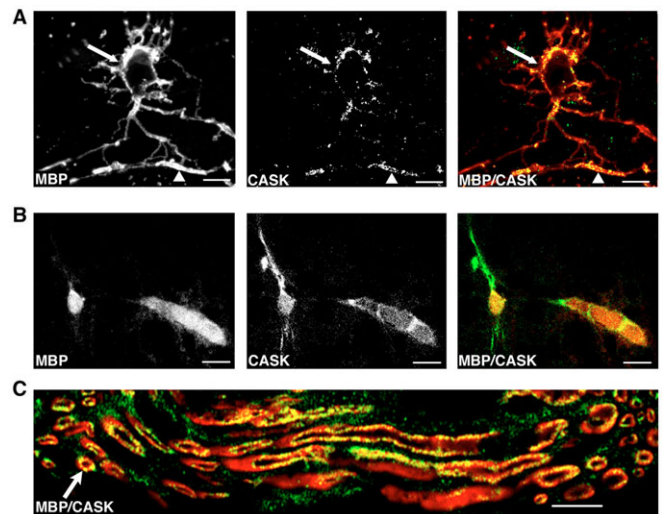

**Fig. 8.** CASK is detectable in MBP-positive OLs and myelinated axons in cocultures and in vivo. (A) OL-neuronal cocultures were immunolabeled with anti-MBP Ab (red) and anti-CASK Ab (green), and analyzed by confocal microscopy followed by the 3D reconstruction of Z-stacks of images. Arrows indicate MBP-positive OLs and arrowheads indicate myelinated fibers. (B,C) CASK (green) is detectable in (B) cells with a chain-like pattern, suggestive of intrafascicular OLs (rat brain) and (C) MBP-positive myelinated fibers in longitudinal or cross-sections (mouse spinal cord). The arrow in (C) indicates a CASK-positive cluster localized in an MBP-positive myelinated fiber in cross-section. Bars, 10  $\mu\text{m}$  (A-C), 5  $\mu\text{m}$  (C).



Sec8 and CASK specifically associate with the major myelin protein OSP/Claudin11 and may play a role in the recruitment of OSP/Claudin11 to the myelin membrane. OSP/Claudin11 is currently the only identified component of the tight junctions that are present along myelin internodes (Dermietzel, 1980; Mugnaini and Schnapp, 1974; Bronstein et al., 1996; Bronstein et al., 1997; Morita et al., 1999; Gow et al., 1999; Tiwari-Woodruff et al., 2001; Chow et al., 2005). The function of these junctions in myelin is not entirely clear, but it can be hypothesized, by analogy with other cell types (Grindstaff et al., 1998; Fanning et al., 1998; Zahraoui et al., 2000; Poliak et al., 2002), that they serve as active organizing centers for vesicle transport and membrane growth during myelin biogenesis. Finally, Sec8 and CASK associate with OSP/Claudin11 in detergent-insoluble glycosphingolipid-cholesterol-enriched microdomains (lipid rafts), structures involved in protein trafficking and membrane polarization (Simons and Ikonen, 1997; Nusrat et al., 2000) that may be of particular importance for myelin membrane formation (Kim et al., 1995; Simons et al., 2000; Taylor et al., 2002; Schneider et al., 2005). Similar to other cell types (Inoue et al., 2003; Salaun et al., 2004), lipid rafts might play a role in exocyst-dependent vesicle recruitment to the myelin membrane.

Little is known about the localization and function of exocyst components in peripheral myelin. This will constitute an interesting avenue for future studies, especially in view of the potential association of Sec8 with multidomain proteins and/or claudins (Itoh et al., 1999; Riefler et al., 2003; Sans et al., 2003; Yeaman et al., 2004), molecules localized at junctional specializations present at the Schmidt-Lanterman incisures, Schwann cell microvilli and paranodal loops, and suggested to play a role in peripheral myelin addition and remodeling (Mugnaini and Schnapp, 1974; Tezlaff et al., 1978; Poliak et al., 2002; Salzer, 2003; Bolino et al., 2004). Further, an *in vivo* functional analysis of the potential role of Sec8 in myelination would be informative but is technically difficult at this point. A Sec8 functional deletion is embryonic lethal (Friedrich et al., 1997), and the development of animal models with conditional Sec8 deletions in specific cell types (e.g. OLs) may also be problematic because recent studies in *Drosophila* suggest that multiple exocyst components are essential for cell viability (Andrews et al., 2002; Murthy et al., 2003; Murthy et al., 2005).

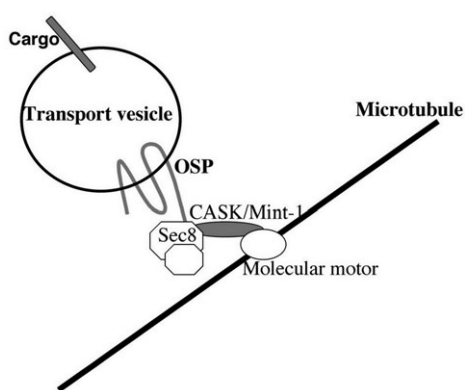

**Fig. 9.** Model. Sec8 associates with the CASK/Mint1 complex and mediates the transport of motor-driven vesicles carrying lipid- and protein-cargoes (e.g. OSP/Claudin11) along microtubules to the OL and myelin membranes.

In summary, we propose a model (Fig. 9), in which key trafficking molecules, including Sec8, CASK and Mint1, are part of a complex that regulates the transport of vesicles carrying lipid and protein cargoes (e.g. OSP/Claudin11) along cytoskeletal elements to the myelin membranes. In this way, these targeting proteins might play important roles in OL maturation, in the progression from initial OL-neuronal adhesion to myelin formation and in myelin membrane maintenance and repair.

## Materials and Methods

### OL cultures

Enriched OL cultures were isolated from neonatal rat telencephalon postnatal day (P) 0-2. Stage-specific enriched OL populations were grown first (a) in mN2 medium supplemented with 10 ng/ml platelet-derived growth factor (PDGF) and fibroblast growth factor 2 (FGF2) (both Amgen) for 72 hours, to obtain early progenitors, followed by culturing in (b) mN2 medium supplemented with 10 ng/ml FGF2 for 48 hours, to obtain late progenitors and were finally (c) further allowed to differentiate without growth factors to obtain mature OLs (Gard and Pfeiffer, 1993; Bottenstein and Sato, 1979; Bansal et al., 1996). Myelinating OL-neuronal cocultures were isolated from mouse brains (embryonic day 15), grown in defined medium and analyzed after 3 weeks (Lubetzki et al., 1993).

### Tissue sections

Animals were perfused with 4% paraformaldehyde (PFA) (10 ml/animal) followed by PBS (10 ml/animal). Isolated rat brains (P 10-12) or mouse spinal cords (P 24) were fixed in 4% PFA in PBS (30 minutes, 4°C), cryo-protected in 20% sucrose overnight at 4°C, frozen in Tissue-Tek (Sakura FineTek), cryosectioned (10-15  $\mu$ m) and post-fixed with 4% PFA (15 minutes, room temperature). Myelin purification was performed as described in Menon et al. (Menon et al., 2003).

### Antibodies

Antibodies (Abs) used were (a) mouse monoclonal Abs against CASK, rSec8 (BD Biosciences), 2E12 (S. C. Hsu, NJ), Sec6 (Stressgen), MOG (C. Linington, Scotland), FLAG and actin (Sigma); (b) rat monoclonal Abs against LAMP2 (QED Biosciences); (c) rabbit polyclonal Abs against dynein (E. Barbarese, Farmington), OSP/Claudin11 (J. M. Bronstein, CA; S. Tsukita, Japan), Mint1 (Synaptic Systems), TGN38 (B. Eipper, CT), MOG (C. Linington), CNP (in house), MBP (Sternberger Monoclonals); (d) secondary Abs conjugated with Alexa-Fluor-488<sup>TM</sup> or -596 (Molecular Probes) and (e) nuclear dye Hoechst 33342.

### Immunocytochemistry

Cells were fixed (4% PFA, 15 minutes, room temperature), permeabilized (0.1% Triton X-100, 5 minutes, 4°C), blocked (10% BSA, 1 hour, 4°C), incubated with primary (1 hour, 4°C) and secondary Abs (20 minutes, 4°C). Tissue was permeabilized (70% ethanol, 15 minutes, room temperature), blocked (10% BSA, 2 hours, room temperature), incubated with primary (overnight, 4°C) and secondary Abs (2 hours, room temperature). All samples were imaged in DABCO medium (250 mg of 1,4-diazobicyclo-(2,2,2)-octane, 9 ml glycerol, 1 ml PBS pH 8.6).

### Immunoblot analysis

OLs were harvested in 1×RIPA buffer (10 mM Tris pH 7.6, 0.01% SDS, 1% Na deoxycholate, 1% NP-40, 150 mM NaCl, 1 mM EGTA) with protease inhibitors [1 mM phenylmethylsulfonyl fluoride (PMSF), 10  $\mu$ g/ml leupeptin/aprotinin; Sigma], homogenized (27G needle), centrifuged (5 minutes, 5000 g), and post-nuclear supernatants or cell lysates run on SDS-PAGE, transferred to a nitrocellulose membrane which was blocked in 5% non-fat milk in 0.5% Tween 20 (Fisher Scientific) (1 hour, room temperature), incubated with the primary (overnight, 4°C) and the secondary (30 minutes, room temperature) Abs. The signal was detected using enhanced chemo-luminescence (ECL, Amersham Biosciences). The mean intensities of the bands were measured (NIH Image1.61), analyzed and shown as mean value  $\pm$  s.d. (ANOVA single factor).

### Immunoprecipitation

Mature OLs were harvested in 0.5×RIPA buffer with 0.5% Triton X-100, homogenized, pre-cleared by centrifugation (30 minutes; 13,000 g), pre-cleared with Protein G beads (Amersham Biosciences) (overnight, 4°C). Lysates (1  $\mu$ g/  $\mu$ l) were incubated with Abs (4-8  $\mu$ g/ml, overnight, 4°C) and then with Protein G beads (2 hours, 4°C). Beads were washed in lysis buffer and protein samples solubilized with reducing or non-reducing Laemmli buffer and run on SDS-PAGE. Each experiment was repeated at least three times.

### Sucrose-gradient ultracentrifugation

OL post-nuclear supernatants were extracted with 1% Triton X-100 in lysis buffer (15 mM NaCl, 50 mM EDTA, 250 mM Tris, protease inhibitors) for 30 minutes at

4°C, centrifuged, and pellets resuspended in 500 µl extraction buffer. This was mixed with 1 ml of 2 M sucrose and overlaid with 2 ml of 1 M and 1.5 ml of 0.2 M sucrose. Samples were centrifuged (16–18 hours; 200,000 g; 4°C) and 0.5 ml fractions removed from the top of the tube. Fraction density was measured by refractometry. Protein was concentrated by ethanol precipitation (overnight, –20°C) and pellets solubilized and run on SDS-PAGE (Kim and Pfeiffer, 1999; Taylor et al., 2002).

### Confocal microscopy and time-lapse analysis

Confocal microscopy analysis was done with a Zeiss 410 microscope with a 63×, 1.4 or 1.25 NA, plan-apochromatic objective (Carl Zeiss). Dual-channel images were simultaneously collected using dual excitation at 488 nm and 568 nm with appropriate emission filters, merged and analyzed with Adobe Photoshop 7 and 3D Imager. Colocalization was measured by ratiometric particle analysis using NIH Image 1.61 (Barbarese et al., 1995). Time-lapse analysis was performed at room temperature and individual particle movement analyzed with Metamorph 6.1 (Universal Imaging Co.).

### Transfection

Transfection of CASK-EGFP (Maximov et al., 2002) and EGFP (R. Mains, CT) constructs was done using Gene Porter2 (Gene Therapy Systems) with 2–5% efficiency. Sec8-FLAG, control null-pShuttle (Ewart et al., 2005) or EGFP (Thiagarajan et al., 2004) adenoviruses were diluted in mN2 ( $10^6$ – $10^7$  plaque forming units/ml) then added to OLs for an overnight incubation.

### Microinjection

Microinjection of OLs was as described in Shan et al. (Shan et al., 2003). We injected  $10^{-13}$ – $10^{-15}$  l of solution/cell, with concentrations of 0.125 µg/µl for Abs and 5 µg/µl for dextran Alexa Fluor 594 (10,000 MW, Molecular Probes).

### siRNA experiments

siRNAs (Dharmacon): four pooled SMART-selected siRNAs that target rat Sec8; four pooled control non-targeting siRNA (two of which target firefly luciferase, all have ≥four mismatches with all known rat genes); fluorescently tagged siGloCyclophilinB siRNAs. JetSI reagent (Qbiogene) was used for siRNA transfection at 50 nM final concentration.

### Morphological complexity

Morphological complexity was assessed as described (Sperber and McMorris, 2001). OLs were assigned to three categories. (1) low: small areas, minimal development of secondary and tertiary processes; (2) medium: medium areas, moderate secondary and tertiary processes, radial symmetry; (3) high: large areas, extensive of secondary and tertiary processes, radial symmetry. We counted cells from six to eight fields/well; *n* indicates the number of wells unless otherwise stated. Data are shown as mean value ± s.d. (Anova single factor).

### Cell death

Cell death was assessed by staining with 10 µg/ml propidium iodide (Molecular Probes; 10 minutes, 37°C) (Hewett et al., 2000).

This work was supported by grants from NIH (NS10861; NS41078). Confocal microscopy was performed at the Center for Cell Analysis and Modeling supported by RR 13186. We thank G. W. Gould for Sec8 and control adenoviruses, Biotechnology and Biological Sciences Research Council (Grants 17/C12621 and 17/REI18423) and the Wellcome Trust (Grant 060629, Research Leave Award); M. Rasband for reagents and critical comments; K. Engisch, M. Rich, I. Bezprozvanny, S. Hsu, J. Bronstein, S. Tsukita, R. Mains, E. Barbarese and C. Linington for reagents; Y. Shih, S. Winkler, S. Maggee and M. Bryant for excellent technical assistance and B. Eipper and C. B. Marta for helpful comments.

### References

- Ainger, K., Avossa, D., Morgan, F., Hill, S. J., Barry, C., Barbarese, E. and Carson, J. H. (1993). Transport and localization of exogenous myelin basic protein mRNA microinjected into oligodendrocytes. *J. Cell Biol.* **123**, 431–441.
- Andrews, H. K., Zhang, Y. Q., Trotta, N. and Broadie, K. (2002). Drosophila sec10 is required for hormone secretion but not general exocytosis or neurotransmission. *Traffic* **3**, 906–921.
- Aronov, S. and Gerst, J. E. (2004). Involvement of the late secretory pathway in actin regulation and mRNA transport in yeast. *J. Biol. Chem.* **279**, 36962–36971.
- Arroyo, E. J. and Scherer, S. S. (2000). On the molecular architecture of myelinated fibers. *Histochem. Cell Biol.* **113**, 1–18.
- Bansal, R., Kumar, M., Murray, K., Morrison, R. S. and Pfeiffer, S. E. (1996). Regulation of FGF receptors in the oligodendrocyte lineage. *Mol. Cell. Neurosci.* **7**, 263–275.
- Barbarese, E., Koppel, D. E., Deutscher, M. P., Smith, C. L., Ainger, K., Morgan, F. and Carson, J. H. (1995). Protein translation components are colocalized in granules in oligodendrocytes. *J. Cell Sci.* **108**, 2781–2790.
- Barres, B. A. and Raff, M. C. (1999). Axonal control of oligodendrocyte development. *J. Cell Biol.* **147**, 1123–1128.
- Berona, S., Laprise, P., Papoula, O., Pelikka, M., Sisson, J. and Tepass, U. (2005). Essential function of Drosophila Sec6 in apical exocytosis of epithelial photoreceptor cells. *J. Cell Biol.* **169**, 635–646.
- Biederer, T. and Sudhof, T. C. (2000). Mints as adaptors. Direct binding to neuroligins and recruitment of munc18. *J. Biol. Chem.* **275**, 39803–39806.
- Bifulco, M., Laezza, C., Stingo, S. and Wolff, J. (2002). 2',3'-Cyclic nucleotide 3'-phosphodiesterase: a membrane-bound, microtubule-associated protein and membrane anchor for tubulin. *Proc. Natl. Acad. Sci. USA* **99**, 1807–1812.
- Bolino, A., Bolis, A., Previtali, S. C., Dina, G., Bussini, S., Dati, G., Amadio, S., Del Carro, U., Mruk, D. D., Feltri, M. L. et al. (2004). Disruption of Mtmr2 produces CMT4B1-like neuropathy with myelin outfoldings and impaired spermatogenesis. *J. Cell Biol.* **167**, 711–721.
- Bottenstein, J. E. and Sato, G. H. (1979). Growth of a rat neuroblastoma cell line in serum-free supplemented medium. *Proc. Natl. Acad. Sci. USA* **76**, 514–517.
- Bronstein, J. M., Popper, P., Micevych, P. E. and Farber, D. B. (1996). Isolation and characterization of a novel oligodendrocyte-specific protein. *Neurology* **47**, 772–778.
- Bronstein, J. M., Micevych, P. E. and Chen, K. (1997). Oligodendrocyte-specific protein (OSP) is a major component of CNS myelin. *J. Neurosci. Res.* **50**, 713–720.
- Brymore, A., Valova, V. A., Larsen, M. R., Roufogalis, B. D. and Robinson, P. J. (2001). The brain exocyst complex interacts with RalA in a GTP-dependent manner: identification of a novel mammalian Sec3 gene and a second Sec15 gene. *J. Biol. Chem.* **276**, 29792–29797.
- Burcelin, R., Rodriguez-Gabin, A. G., Charron, M. J., Almazan, G. and Larocca, J. N. (1997). Molecular analysis of the monomeric GTP-binding proteins of oligodendrocytes. *Brain Res. Mol. Brain Res.* **50**, 9–15.
- Butz, S., Okamoto, M. and Sudhof, T. C. (1998). A tripartite protein complex with the potential to couple synaptic vesicle exocytosis to cell adhesion in brain. *Cell* **94**, 773–782.
- Campagnoni, A. T., Verdi, J. M., Verity, A. N., Amur-Umarjee, S. and Byravan, S. (1991). Posttranscriptional regulation of myelin protein gene expression. *Ann. New York Acad. Sci.* **633**, 178–188.
- Chow, E., Mottahedeh, J., Prins, M., Ridder, W., Nusinowitz, S. and Bronstein, J. M. (2005). Disrupted compaction of CNS myelin in an OSP/Claudin-11 and PLP/DM20 double knockout mouse. *Mol. Cell Neurosci.* **29**, 405–413.
- Colman, D. R., Kreibich, G., Frey, A. B. and Sabatini, D. D. (1982). Synthesis and incorporation of myelin polypeptides into CNS myelin. *J. Cell Biol.* **95**, 598–608.
- Dermietzel, R., Leibstein, A. G. and Schunke, D. (1980). Interlamellar tight junctions of central myelin. II. A freeze fracture and cytochemical study on their arrangement and composition. *Cell Tissue Res.* **213**, 95–108.
- de Vries, H., Schrage, C. and Hoekstra, D. (1998). An apical-type trafficking pathway is present in cultured oligodendrocytes but the sphingolipid-enriched myelin membrane is the target of a basolateral-type pathway. *Mol. Cell* **9**, 599–609.
- de Vries, H. and Hoekstra, D. (2000). On the biogenesis of the myelin sheath: cognate polarized trafficking pathways in oligodendrocytes. *Glycoconj. J.* **17**, 181–190.
- Dyer, C. A. and Benjamins, J. A. (1989). Organization of oligodendroglial membrane sheets. I: Association of myelin basic protein and 2', 3'-cyclic nucleotide 3'-phosphohydrolase with cytoskeleton. *J. Neurosci. Res.* **24**, 201–211.
- Ewart, M. A., Clarke, M., Kane, S., Chamberlain, L. H. and Gould, G. W. (2005). Evidence for a role of the exocyst in insulin-stimulated Glut4 trafficking in 3T3-L1 adipocytes. *J. Biol. Chem.* **280**, 3812–3816.
- Fallon, L., Moreau, F., Croft, B. G., Labib, N., Gu, W. J. and Fon, E. A. (2002). Parkin and CASK/LIN-2 associate via a PDZ-mediated interaction and are co-localized in lipid rafts and postsynaptic densities in brain. *J. Biol. Chem.* **277**, 486–491.
- Fanning, A. S., Jameson, B. J., Jesaitis, L. A. and Anderson, J. M. (1998). The tight junction protein ZO-1 establishes a link between the transmembrane protein occludin and the actin cytoskeleton. *J. Biol. Chem.* **273**, 29745–29753.
- Friedrich, G. A., Hildebrand, J. D. and Soriano, P. (1997). The secretory protein Sec8 is required for paraxial mesoderm formation in the mouse. *Dev. Biol.* **192**, 364–374.
- Gard, A. L. and Pfeiffer, S. E. (1993). Glial cell mitogens bFGF and PDGF differentially regulate development of O4+GalC- oligodendrocyte progenitors. *Dev. Biol.* **159**, 618–630.
- Gould, R. M. (1977). Incorporation of glycoproteins into peripheral nerve myelin. *J. Cell Biol.* **75**, 326–338.
- Gow, A., Southwood, C. M., Li, J. S., Pariali, M., Riordan, G. P., Brodie, S. E., Danias, J., Bronstein, J. M., Kachar, B. and Lazzarini, R. A. (1999). CNS myelin and sirtelli cell tight junction strands are absent in Osp/claudin-11 null mice. *Cell* **99**, 649–659.
- Grindstaff, K. K., Yeaman, C., Anandasabapathy, N., Hsu, S. C., Rodriguez-Boulan, E., Scheller, R. H. and Nelson, W. J. (1998). Sec6/8 complex is recruited to cell-cell contacts and specifies transport vesicle delivery to the basal-lateral membrane in epithelial cells. *Cell* **93**, 731–740.
- Gundelfinger, E. D. and tom Dieck, S. (2000). Molecular organization of excitatory chemical synapses in the mammalian brain. *Naturwissenschaften* **87**, 513–523.
- Hata, Y., Butz, S. and Sudhof, T. C. (1996). CASK: a novel dlg/PSD95 homolog with an N-terminal calmodulin-dependent protein kinase domain identified by interaction with neuroligins. *J. Neurosci.* **16**, 2488–2494.
- Hazuka, C. D., Fioletti, D. L., Hsu, S. C., Kee, Y., Hopf, F. W. and Scheller, R. H. (1999). The sec6/8 complex is located at neurite outgrowth and axonal synapse-assembly domains. *J. Neurosci.* **19**, 1324–1334.

- Hewett, S. J., Uliasz, T. F., Vidwans, A. S. and Hewett, J. A. (2000). Cyclooxygenase-2 contributes to N-methyl-D-aspartate-mediated neuronal cell death in primary cortical cell culture. *J. Pharmacol. Exp. Ther.* **293**, 417-425.
- Hirokawa, N. and Takemura, R. (2005). Molecular motors and mechanisms of directional transport in neurons. *Nat. Rev. Neurosci.* **6**, 201-214.
- Hsu, S. C., Hazuka, C. D., Roth, R., Foletti, D. L., Heuser, J. and Scheller, R. H. (1998). Subunit composition, protein interactions, and structures of the mammalian brain sec6/8 complex and septin filaments. *Neuron* **20**, 1111-1122.
- Huber, L. A., Madison, D. L., Simons, K. and Pfeiffer, S. E. (1994). Myelin membrane biogenesis by oligodendrocytes. Developmental regulation of low molecular weight GTP-binding proteins. *FEBS Lett.* **347**, 273-278.
- Inoue, M., Chang, L., Hwang, J., Chiang, S. H. and Saltiel, A. R. (2003). The exocyst complex is required for targeting of Glut4 to the plasma membrane by insulin. *Nature* **422**, 629-633.
- Itoh, M., Furuse, M., Morita, K., Kubota, K., Saitou, M. and Tsukita, S. (1999). Direct binding of three tight junction-associated MAGUKs, ZO-1, ZO-2, and ZO-3, with the COOH termini of claudins. *J. Cell Biol.* **147**, 1351-1363.
- Jahn, R. (2004). Principles of exocytosis and membrane fusion. *Ann. New York Acad. Sci.* **1014**, 170-178.
- Kim, T. and Pfeiffer, S. E. (1999). Myelin glycosphingolipid/cholesterol-enriched microdomains selectively sequester the non-compact myelin proteins CNP and MOG. *J. Neurocytol.* **28**, 281-293.
- Kim, T., Fiedler, K., Madison, D. L., Krueger, W. H. and Pfeiffer, S. E. (1995). Cloning and characterization of MVP17: a developmentally regulated myelin protein in oligodendrocytes. *J. Neurosci. Res.* **42**, 413-422.
- Kroepfl, J. F. and Gardinier, M. V. (2001). Identification of a basolateral membrane targeting signal within the cytoplasmic domain of myelin/oligodendrocyte glycoprotein. *J. Neurochem.* **77**, 1301-1309.
- Lee, J., Gravel, M., Zhang, R., Thibault, P. and Braun, P. E. (2005). Process outgrowth in oligodendrocytes is mediated by CNP, a novel microtubule assembly myelin protein. *J. Cell Biol.* **170**, 661-673.
- Lee, S., Fan, S., Makarova, O., Straight, S. and Margolis, B. (2002). A novel and conserved protein-protein interaction domain of mammalian Lin-2/CASK binds and recruits SAP97 to the lateral surface of epithelia. *Mol. Cell. Biol.* **22**, 1778-1791.
- Leonoudakis, D., Conti, L. R., Anderson, S., Radeke, C. M., McGuire, L. M., Adams, M. E., Froehner, S. C., Yates, J. R., 3rd and Vandenberg, C. A. (2004). Protein trafficking and anchoring complexes revealed by proteomic analysis of inward rectifier potassium channel (Kir2.x)-associated proteins. *J. Biol. Chem.* **279**, 22331-22346.
- Lipschutz, J. H., Guo, W., O'Brien, L. E., Nguyen, Y. H., Novick, P. and Mostov, K. E. (2000). Exocyst is involved in cystogenesis and tubulogenesis and acts by modulating synthesis and delivery of basolateral plasma membrane and secretory proteins. *Mol. Biol. Cell* **11**, 4259-4275.
- Lipschutz, J. H., Lingappa, V. R. and Mostov, K. E. (2003). The exocyst affects protein synthesis by acting on the translocation machinery of the endoplasmic reticulum. *J. Biol. Chem.* **278**, 20954-20960.
- Lubetzki, C., Demerens, C., Anglade, P., Villarroya, H., Frankfurter, A., Lee, V. M. and Zalc, B. (1993). Even in culture, oligodendrocytes myelinate solely axons. *Proc. Natl. Acad. Sci. USA* **90**, 6820-6824.
- Madison, D. L., Kruger, W. H., Kim, T. and Pfeiffer, S. E. (1996). Differential expression of rab3 isoforms in oligodendrocytes and astrocytes. *J. Neurosci. Res.* **45**, 258-268.
- Madison, D. L., Krueger, W. H., Cheng, D., Trapp, B. D. and Pfeiffer, S. E. (1999). SNARE complex proteins, including the cognate pair VAMP-2 and syntaxin-4, are expressed in cultured oligodendrocytes. *J. Neurochem.* **72**, 988-998.
- Marta, C. B., Taylor, C. M., Coetzee, T., Kim, T., Winkler, S., Bansal, R. and Pfeiffer, S. E. (2003). Antibody cross-linking of myelin oligodendrocyte glycoprotein leads to its rapid repartitioning into detergent-insoluble fractions, and altered protein phosphorylation and cell morphology. *J. Neurosci.* **23**, 5461-5471.
- Marta, C. B., Oliver, A. R., Sweet, R. A., Pfeiffer, S. E. and Ruddle, N. H. (2005). Pathogenic myelin oligodendrocyte glycoprotein antibodies recognize glycosylated epitopes and perturb oligodendrocyte physiology. *Proc. Natl. Acad. Sci. USA* **102**, 13992-13997.
- Martinez-Estrada, O. M., Villa, A., Breviario, F., Orsenigo, F., Dejana, E. and Bazzoni, G. (2001). Association of junctional adhesion molecule with calcium/calmodulin-dependent serine protein kinase (CASK/LIN-2) in human epithelial caco-2 cells. *J. Biol. Chem.* **276**, 9291-9296.
- Matern, H. T., Yeaman, C., Nelson, W. J. and Scheller, R. H. (2001). The Sec6/8 complex in mammalian cells: characterization of mammalian Sec3, subunit interactions, and expression of subunits in polarized cells. *Proc. Natl. Acad. Sci. USA* **98**, 9648-9653.
- Maximov, A. and Bezprozvany, I. (2002). Synaptic targeting of N-type calcium channels in hippocampal neurons. *J. Neurosci.* **22**, 6939-6952.
- Mehta, S. Q., Hiesinger, P. R., Beronja, S., Zhai, R. G., Schulze, K. L., Verstreken, P., Cao, Y., Zhou, Y., Tepass, U., Crair, M. C. et al. (2005). Mutations in Drosophila sec15 reveal a function in neuronal targeting for a subset of exocyst components. *Neuron* **46**, 219-232.
- Menon, K., Rasband, M. N., Taylor, C. M., Brophy, P., Bansal, R. and Pfeiffer, S. E. (2003). The myelin-axolemmal complex: biochemical dissection and the role of galactosphingolipids. *J. Neurochem.* **87**, 995-1009.
- Minuk, J. and Braun, P. E. (1996). Differential intracellular sorting of the myelin-associated glycoprotein isoforms. *J. Neurosci. Res.* **44**, 411-420.
- Morita, K., Sasaki, H., Fujimoto, K., Furuse, M. and Tsukita, S. (1999). Claudin-11/OSP-based tight junctions of myelin sheaths in brain and Sertoli cells in testis. *J. Cell Biol.* **145**, 579-588.
- Moskalenko, S., Henry, D. O., Rosse, C., Mirey, G., Camonis, J. H. and White, M. A. (2002). The exocyst is a Ral effector complex. *Nat. Cell Biol.* **4**, 66-72.
- Moskalenko, S., Tong, C., Rosse, C., Mirey, G., Formstecher, E., Daviet, L., Camonis, J. and White, M. A. (2003). Ral GTPases regulate exocyst assembly through dual subunit interactions. *J. Biol. Chem.* **278**, 51743-51748.
- Mugnaini, E. and Schnapp, B. (1974). Possible role of zonula occludens of the myelin sheath in demyelinating conditions. *Nature* **251**, 725-727.
- Murthy, M. and Schwarz, T. L. (2004). The exocyst component Sec5 is required for membrane traffic and polarity in the Drosophila ovary. *Development* **131**, 377-388.
- Murthy, M., Garza, D., Scheller, R. H. and Schwarz, T. L. (2003). Mutations in the exocyst component Sec5 disrupt neuronal membrane traffic, but neurotransmitter release persists. *Neuron* **37**, 433-447.
- Murthy, M., Ranjan, R., Deneff, N., Higashi, M. E., Schupbach, T. and Schwarz, T. L. (2005). Sec6 mutations and the Drosophila exocyst complex. *J. Cell Sci.* **118**, 1139-1150.
- Nelson, W. J. (2003). Adaptation of core mechanisms to generate cell polarity. *Nature* **422**, 766-774.
- Novick, P., Field, C. and Schekman, R. (1980). Identification of 23 complementation groups required for post-translational events in the yeast secretory pathway. *Cell* **21**, 205-215.
- Nusrat, A., Parkos, C. A., Verkade, P., Foley, C. S., Liang, T. W., Innis-Whitehouse, W., Eastburn, K. K. and Madara, J. L. (2000). Tight junctions are membrane microdomains. *J. Cell Sci.* **113**, 1771-1781.
- Olsen, O., Liu, H., Wade, J. B., Merot, J. and Welling, P. A. (2002). Basolateral membrane expression of the Kir 2.3 channel is coordinated by PDZ interaction with Lin-7/CASK complex. *Am. J. Physiol. Cell Physiol.* **282**, C183-C195.
- Pedraza, L., Huang, J. K. and Colman, D. R. (2001). Organizing principles of the axoglial apparatus. *Neuron* **30**, 335-344.
- Pfeiffer, S. E., Barbarese, E. and Bhat, S. (1981). Requirement for nonoligodendrocyte cell signals for enhanced myelinogenic gene expression in long-term cultures of purified rat oligodendrocytes. *Proc. Natl. Acad. Sci. USA* **78**, 1283-1287.
- Pfeiffer, S. E., Warrington, A. E. and Bansal, R. (1993). The oligodendrocyte and its many cellular processes. *Trends Cell Biol.* **3**, 191-197.
- Poliak, S., Mattis, S., Ullmer, C., Scherer, S. S. and Peles, E. (2002). Distinct claudins and associated PDZ proteins form different autotypic tight junctions in myelinating Schwann cells. *J. Cell Biol.* **159**, 361-372.
- Prigent, M., Dubois, T., Raposo, G., Derrien, V., Tenza, D., Rosse, C., Camonis, J. and Chavrier, P. (2003). ARF6 controls post-endocytic recycling through its downstream exocyst complex effector. *J. Cell Biol.* **163**, 1111-1121.
- Riefler, G. M., Balasingam, G., Lucas, K. G., Wang, S., Hsu, S. C. and Firestein, B. L. (2003). Exocyst complex subunit sec8 binds to postsynaptic density protein-95 (PSD-95): a novel interaction regulated by cyprin (cytosolic PSD-95 interactor). *Biochem. J.* **373**, 49-55.
- Rodriguez-Gabin, A. G., Cammer, M., Almazan, G., Charron, M. and Larocca, J. N. (2001). Role of rRAB22b, an oligodendrocyte protein, in regulation of transport of vesicles from trans Golgi to endocytic compartments. *J. Neurosci. Res.* **66**, 1149-1160.
- Rodriguez-Gabin, A. G., Almazan, G. and Larocca, J. N. (2004). Vesicle transport in oligodendrocytes: probable role of Rab40c protein. *J. Neurosci. Res.* **76**, 758-770.
- Roh, M. H. and Margolis, B. (2003). Composition and function of PDZ protein complexes during cell polarization. *Am. J. Physiol. Renal Physiol.* **285**, F377-F387.
- Salaun, C., James, D. J. and Chamberlain, L. H. (2004). Lipid rafts and the regulation of exocytosis. *Traffic* **5**, 255-264.
- Salzer, J. L. (2003). Polarized domains of myelinated axons. *Neuron* **40**, 297-318.
- Sans, N., Prybylowski, K., Petralia, R. S., Chang, K., Wang, Y. X., Racca, C., Vicini, S. and Wenthold, R. J. (2003). NMDA receptor trafficking through an interaction between PDZ proteins and the exocyst complex. *Nat. Cell Biol.* **5**, 520-530.
- Schneider, A., Lander, H., Schulz, G., Wolburg, H., Nave, K. A., Schulz, J. B. and Simons, M. (2005). Palmitoylation is a sorting determinant for transport to the myelin membrane. *J. Cell Sci.* **118**, 2415-2423.
- Setou, M., Nakagawa, T., Seog, D. H. and Hirokawa, N. (2000). Kinesin superfamily motor protein KIF17 and mLin-10 in NMDA receptor-containing vesicle transport. *Science* **288**, 1796-1802.
- Shan, J., Munro, T. P., Barbarese, E., Carson, J. H. and Smith, R. (2003). A molecular mechanism for mRNA trafficking in neuronal dendrites. *J. Neurosci.* **23**, 8859-8866.
- Simons, K. and Ikonen, E. (1997). Functional rafts in cell membranes. *Nature* **387**, 569-572.
- Simons, M., Kramer, E. M., Thiele, C., Stoffel, W. and Trotter, J. (2000). Assembly of myelin by association of proteolipid protein with cholesterol- and galactosylceramide-rich membrane domains. *J. Cell Biol.* **151**, 143-154.
- Sperber, B. R. and McMorris, F. A. (2001). Fyn tyrosine kinase regulates oligodendroglial cell development but is not required for morphological differentiation of oligodendrocytes. *J. Neurosci. Res.* **63**, 303-312.
- Sugihara, K., Asano, S., Tanaka, K., Iwamatsu, A., Okawa, K. and Ohta, Y. (2002). The exocyst complex binds the small GTPase RalA to mediate filopodia formation. *Nat. Cell Biol.* **4**, 73-78.
- Taylor, C. M., Coetzee, T. and Pfeiffer, S. E. (2002). Detergent-insoluble glycosphingolipid/cholesterol microdomains of the myelin membrane. *J. Neurochem.* **81**, 993-1004.
- TerBush, D. R., Maurice, T., Roth, D. and Novick, P. (1996). The Exocyst is a

- multiprotein complex required for exocytosis in *Saccharomyces cerevisiae*. *EMBO J.* **15**, 6483-6494.
- Tetzlaff, W.** (1978). The development of a zonula occludens in peripheral myelin of the chick embryo. A freeze-fracture study. *Cell Tissue Res.* **189**, 187-201.
- Thiagarajan, R., Tewolde, T., Li, Y., Becker, P. L., Rich, M. M. and Engisch, K. L.** (2004). Rab3A negatively regulates activity-dependent modulation of exocytosis in bovine adrenal chromaffin cells. *J. Physiol.* **555**, 439-457.
- Ting, A. E., Hazuka, C. D., Hsu, S. C., Kirk, M. D., Bean, A. J. and Scheller, R. H.** (1995). rSec6 and rSec8, mammalian homologs of yeast proteins essential for secretion. *Proc. Natl. Acad. Sci. USA* **92**, 9613-9617.
- Tiwari-Woodruff, S. K., Buznikov, A. G., Vu, T. Q., Micevych, P. E., Chen, K., Kornblum, H. I. and Bronstein, J. M.** (2001). OSP/claudin-11 forms a complex with a novel member of the tetraspanin super family and beta1 integrin and regulates proliferation and migration of oligodendrocytes. *J. Cell Biol.* **153**, 295-305.
- Toikkanen, J. H., Miller, K. J., Soderlund, H., Jantti, J. and Keranen, S.** (2003). The beta subunit of the Sec61p endoplasmic reticulum translocon interacts with the exocyst complex in *Saccharomyces cerevisiae*. *J. Biol. Chem.* **278**, 20946-20953.
- Trapp, B. D., Kidd, G. J., Hauer, P., Mulrenin, E., Haney, C. A. and Andrews, S. B.** (1995). Polarization of myelinating Schwann cell surface membranes: role of microtubules and the trans-Golgi network. *J. Neurosci.* **15**, 1797-1807.
- Trapp, B. D., Pfeiffer, S. E., Anitei, M. and Kidd, G. J.** (2004). Cell biology of myelin assembly. In *Myelin Biology and Disorders* (ed. R. Lazzarini), pp. 29-55. San Diego (CA): Elsevier Academic Press.
- Tsuboi, T., Ravier, M. A., Xie, H., Ewart, M. A., Gould, G. W., Baldwin, S. A. and Rutter, G. A.** (2005). Mammalian exocyst complex is required for the docking step of insulin vesicle exocytosis. *J. Biol. Chem.* **278**, 52042-52051.
- Vega, I. E. and Hsu, S. C.** (2001). The exocyst complex associates with microtubules to mediate vesicle targeting and neurite outgrowth. *J. Neurosci.* **21**, 3839-3848.
- Vik-Mo, E. O., Oltedal, L., Hoivik, E. A., Kleivdal, H., Eidet, J. and Davanger, S.** (2003). Sec6 is localized to the plasma membrane of mature synaptic terminals and is transported with secretogranin II-containing vesicles. *Neuroscience* **119**, 73-85.
- Wang, S., Liu, Y., Adamson, C. L., Valdez, G., Guo, W. and Hsu, S. C.** (2004). The mammalian exocyst, a complex required for exocytosis, inhibits tubulin polymerization. *J. Biol. Chem.* **279**, 35958-35966.
- Yeaman, C., Grindstaff, K. K., Wright, J. R. and Nelson, W. J.** (2001). Sec6/8 complexes on trans-Golgi network and plasma membrane regulate late stages of exocytosis in mammalian cells. *J. Cell Biol.* **155**, 593-604.
- Yeaman, C., Grindstaff, K. K. and Nelson, W. J.** (2004). Mechanism of recruiting Sec6/8 (exocyst) complex to the apical junctional complex during polarization of epithelial cells. *J. Cell Sci.* **117**, 559-570.
- Zahraoui, A., Louvard, D. and Galli, T.** (2000). Tight junction, a platform for trafficking and signaling protein complexes. *J. Cell Biol.* **151**, F31-F36.
- Zaliapin, I., Semenova, I., Kashina, A. and Rodionov, V.** (2005). Multiscale trend analysis of microtubule transport in melanophores. *Biophys. J.* **88**, 4008-4016.
- Zhang, X. M., Ellis, S., Sriratanana, A., Mitchell, C. A. and Rowe, T.** (2004). Sec15 is an effector for the Rab11 GTPase in mammalian cells. *J. Biol. Chem.* **279**, 43027-43034.
- Zhang, Y., Luan, Z., Liu, A. and Hu, G.** (2001). The scaffolding protein CASK mediates the interaction between rabphilin3a and beta-neurexins. *FEBS Lett.* **497**, 99-102.
